# Supplementary material
Source: ML conference proceedings conference paper supplement (https://openaccess.thecvf.com/content/ICCV_2017/html/Dahl_Pixel_Recursive_Super_ICCV_2017_paper.html)
Supplement: Supplementary file 1 [file Dahl_Pixel_Recursive_Super_ICCV_2017_supplemental.pdf]

# Supplementary Material: Pixel Recursive Super Resolution

Ryan Dahl      Mohammad Norouzi      Jonathon Shlens

Google Brain

{rld,mnorouzi,shlens}@google.com

## 1. Hyperparameters for pixel recursive super resolution model.

| Operation                                         | Kernel                                           | Strides | Feature maps |
|---------------------------------------------------|--------------------------------------------------|---------|--------------|
| Conditional network – $8 \times 8 \times 3$ input |                                                  |         |              |
| $B \times$ ResNet block                           | $3 \times 3$                                     | 1       | 32           |
| Transposed Convolution                            | $3 \times 3$                                     | 2       | 32           |
| $B \times$ ResNet block                           | $3 \times 3$                                     | 1       | 32           |
| Transposed Convolution                            | $3 \times 3$                                     | 2       | 32           |
| $B \times$ ResNet block                           | $3 \times 3$                                     | 1       | 32           |
| Convolution                                       | $1 \times 1$                                     | 1       | $3 * 256$    |
| PixelCNN network – $32 \times 32 \times 3$ input  |                                                  |         |              |
| Masked Convolution                                | $7 \times 7$                                     | 1       | 64           |
| $20 \times$ Gated Convolution Blocks              | $5 \times 5$                                     | 1       | 64           |
| Masked Convolution                                | $1 \times 1$                                     | 1       | 1024         |
| Masked Convolution                                | $1 \times 1$                                     | 1       | $3 * 256$    |
| Optimizer                                         | RMSProp (decay=0.95, momentum=0.9, epsilon=1e-8) |         |              |
| Batch size                                        | 32                                               |         |              |
| Iterations                                        | 2,000,000 for Bedrooms, 200,000 for faces.       |         |              |
| Learning Rate                                     | 0.0004 and divide by 2 every 500000 steps.       |         |              |
| Weight, bias initialization                       | truncated normal (stddev=0.1), Constant(0)       |         |              |

Table 1: Hyperparameters used for both datasets. For LSUN bedrooms  $B = 10$  and for the cropped CelebA faces  $B = 6$ .

## 2. Samples from models trained on LSUN bedrooms

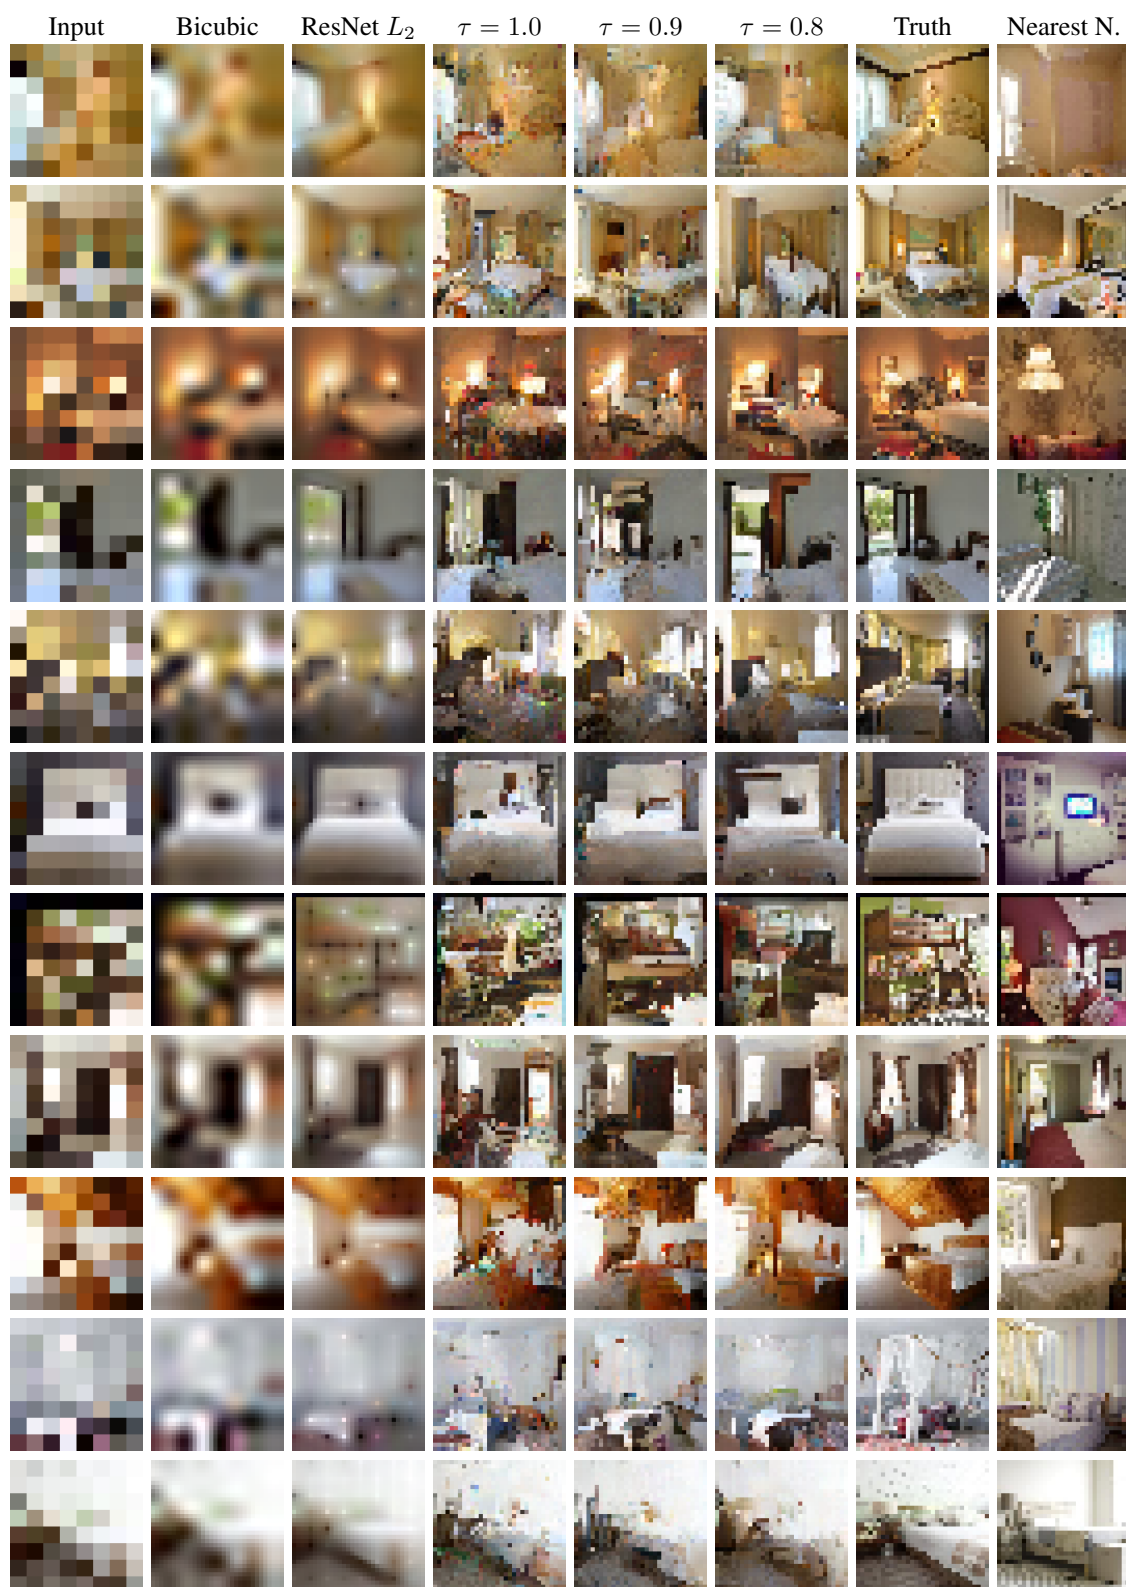

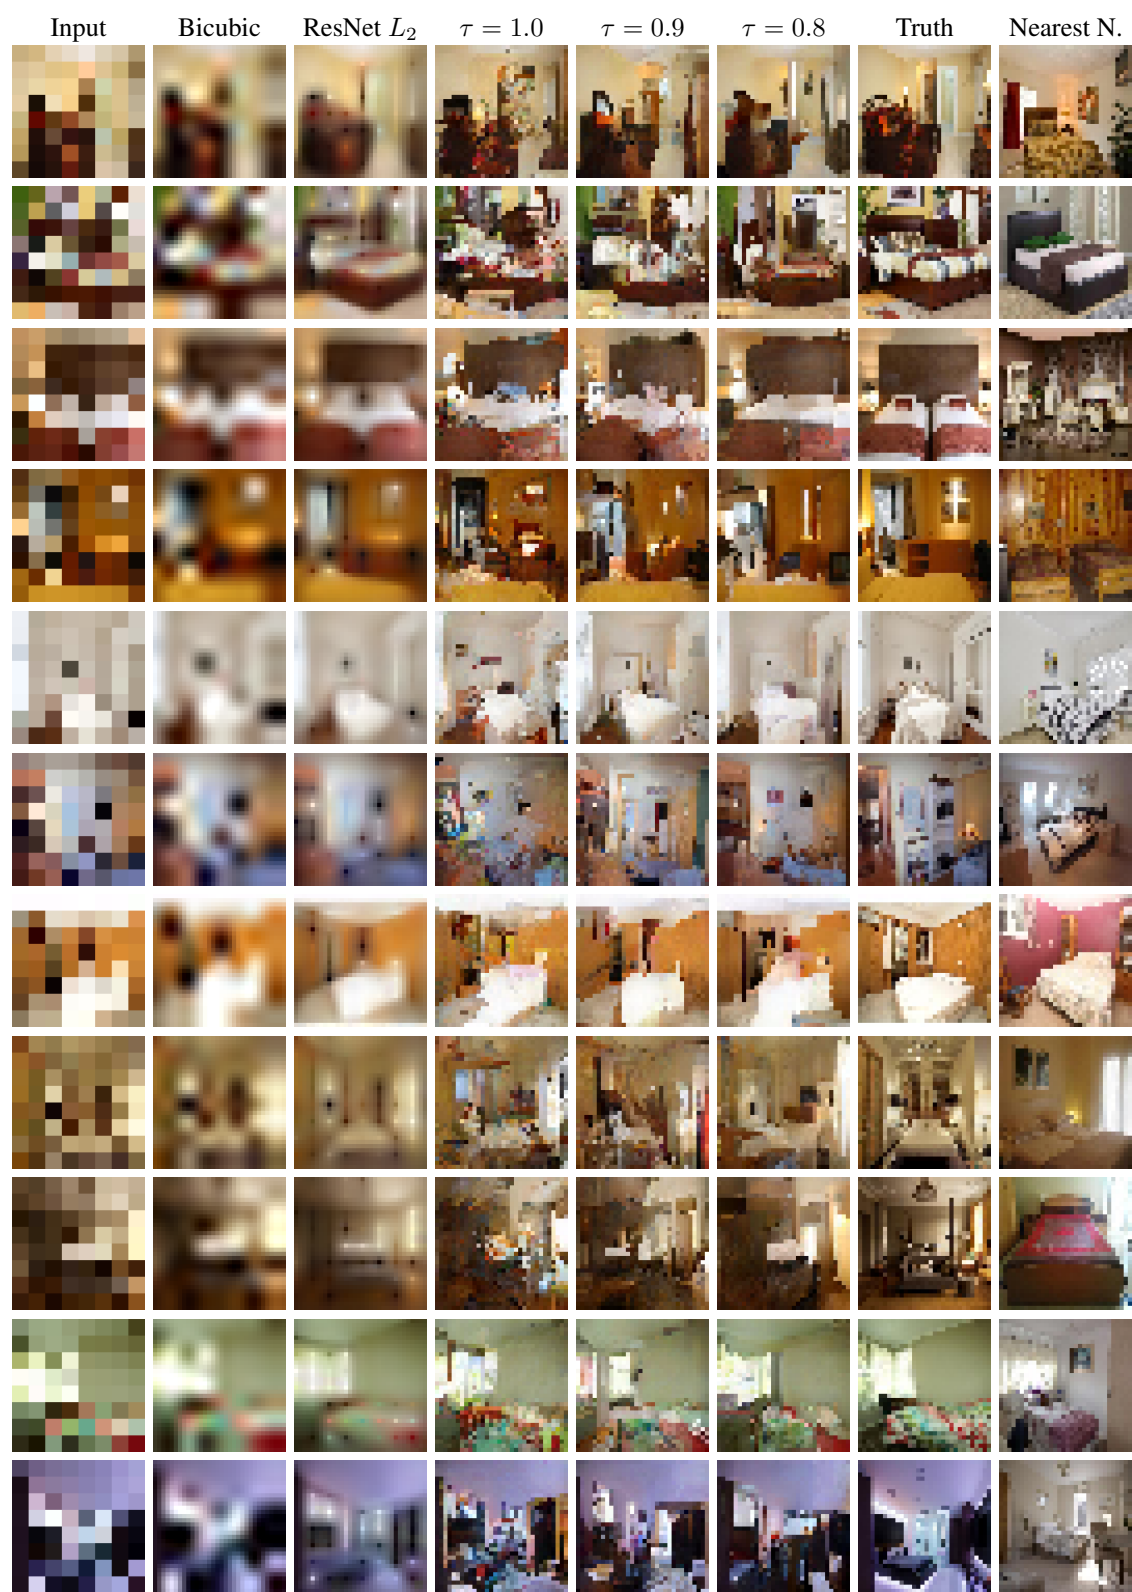

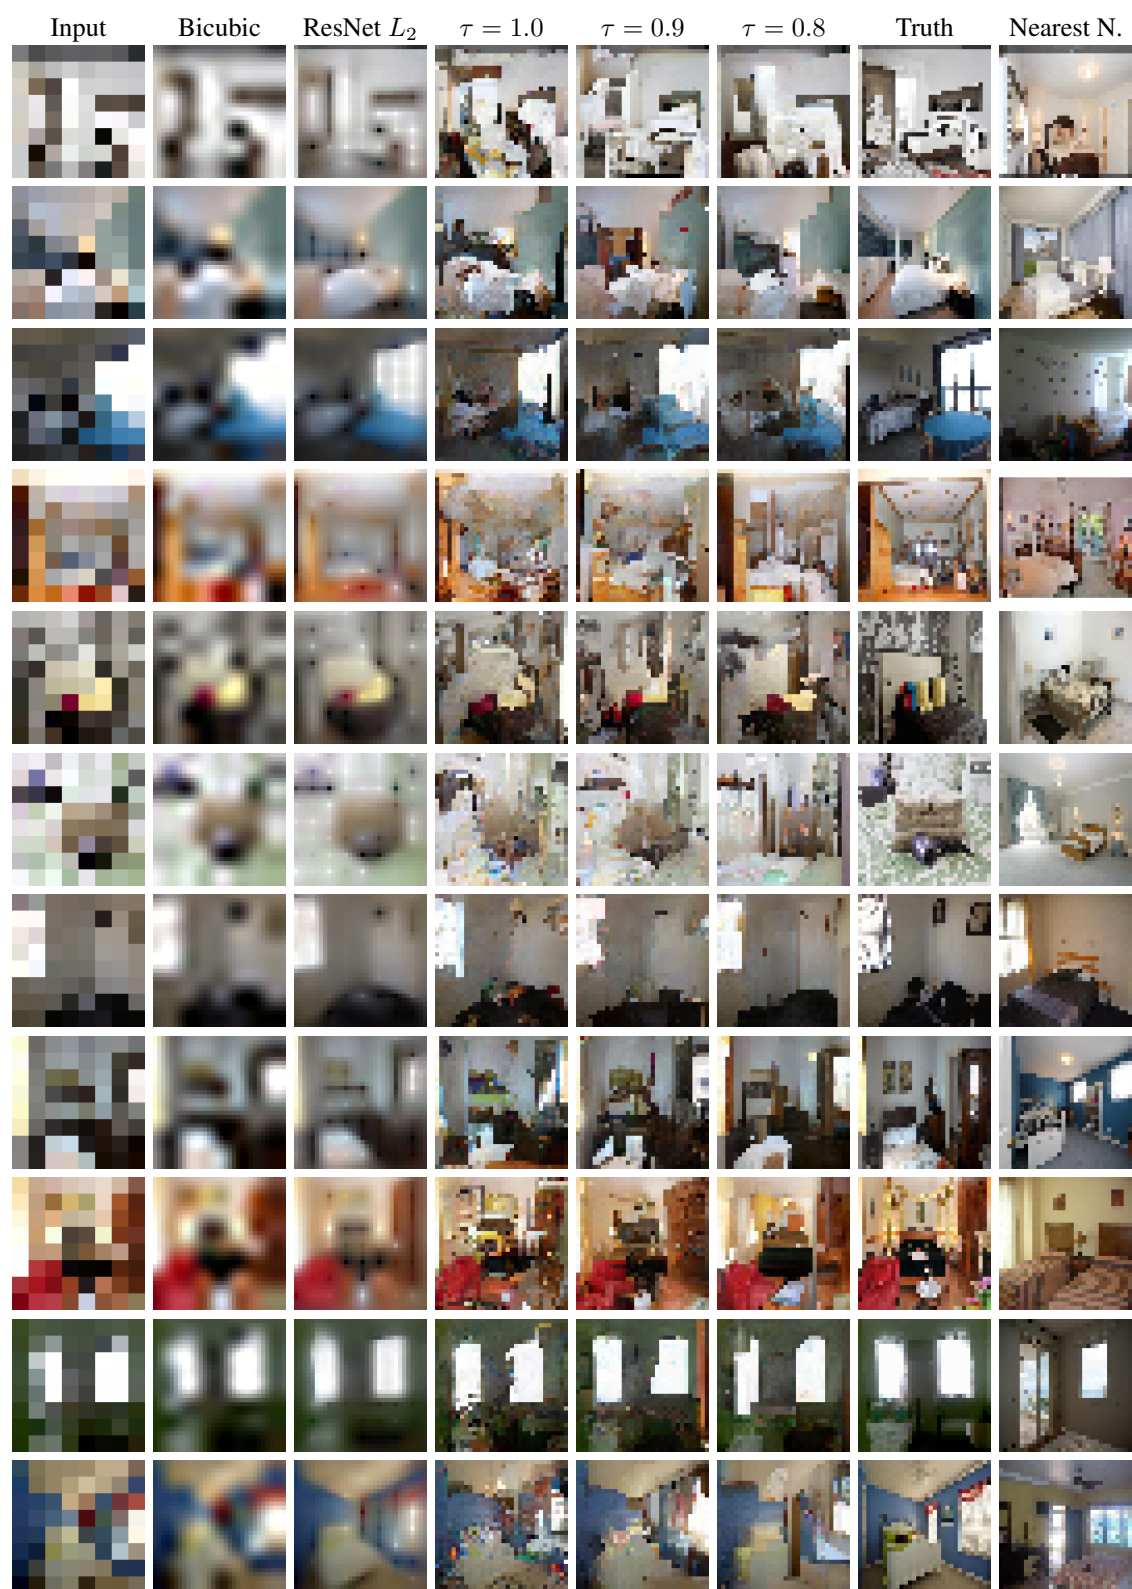

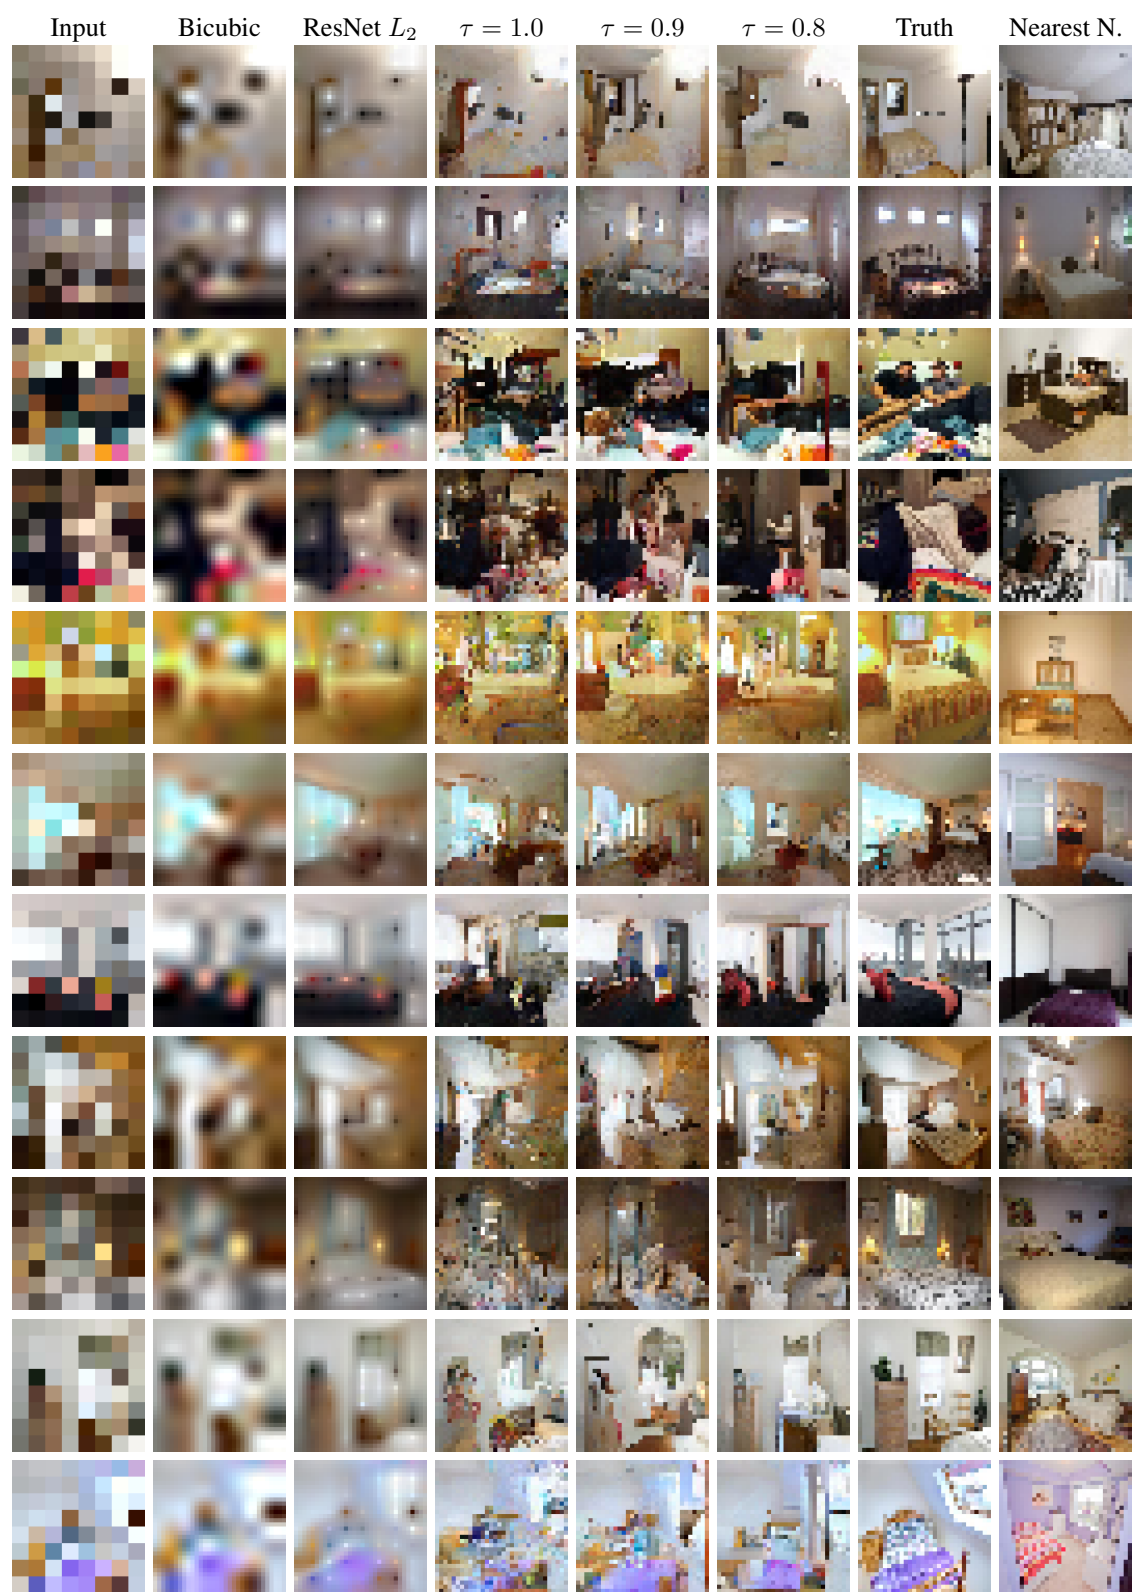

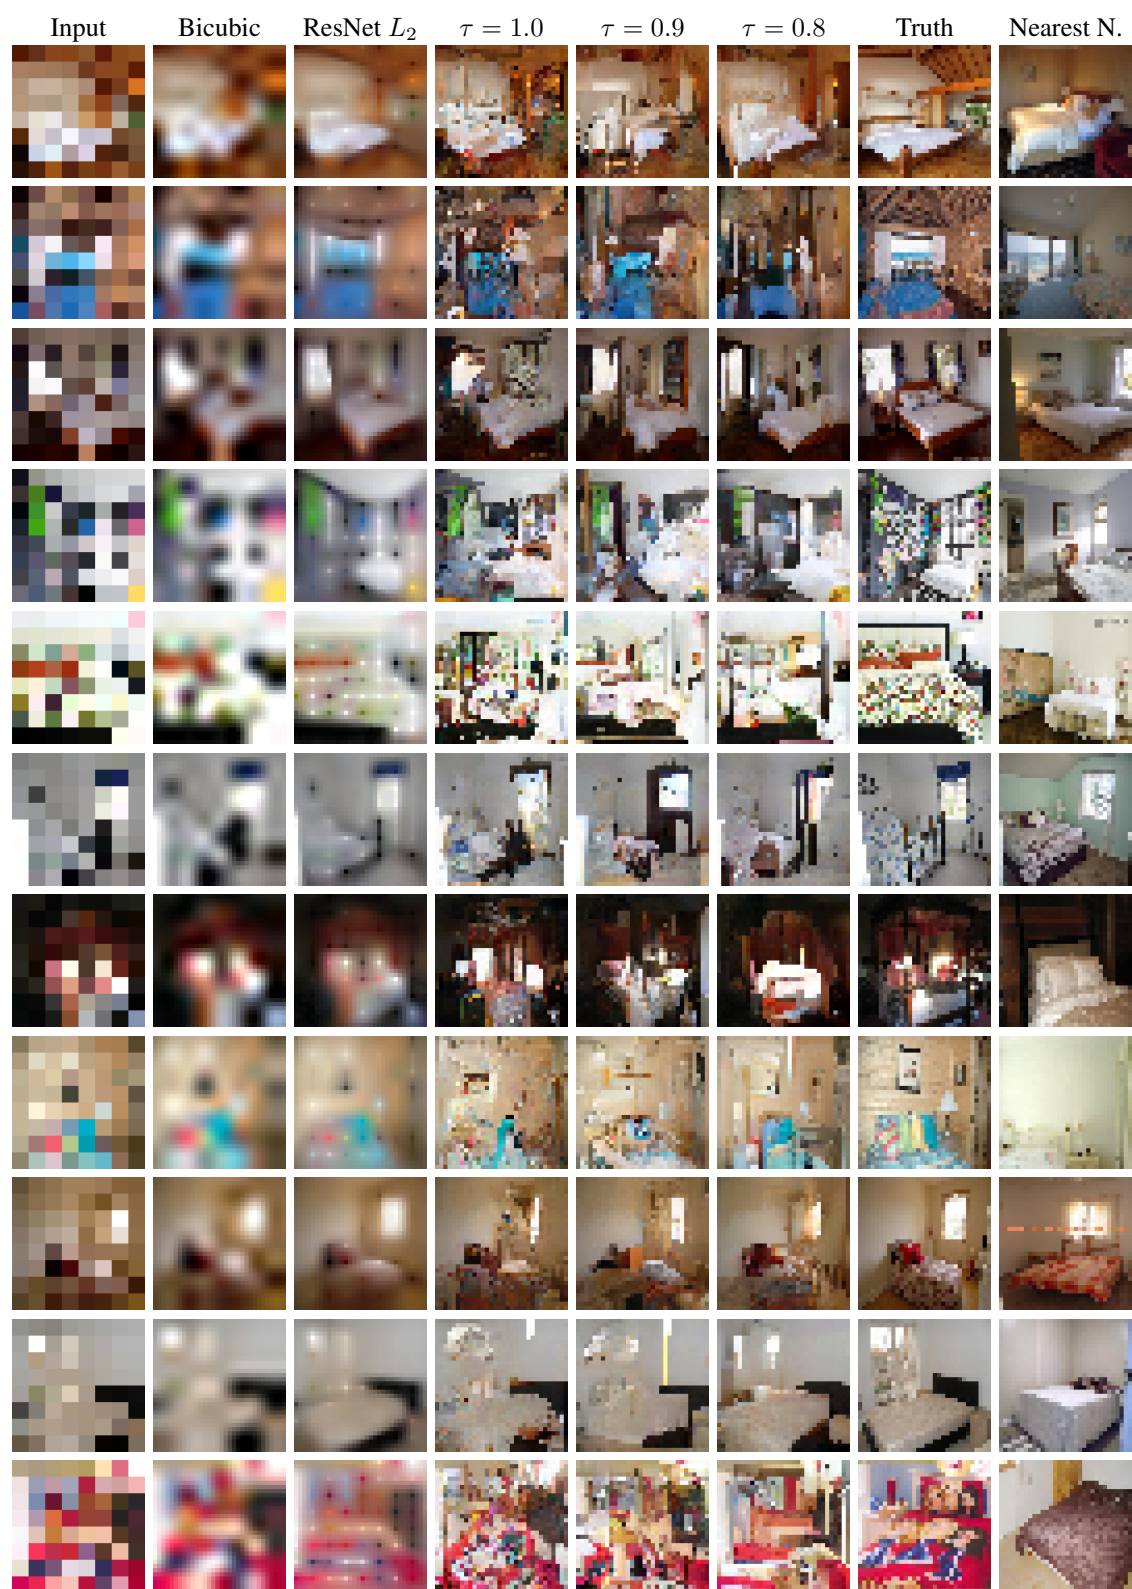



### 3. Samples from models trained on CelebA faces

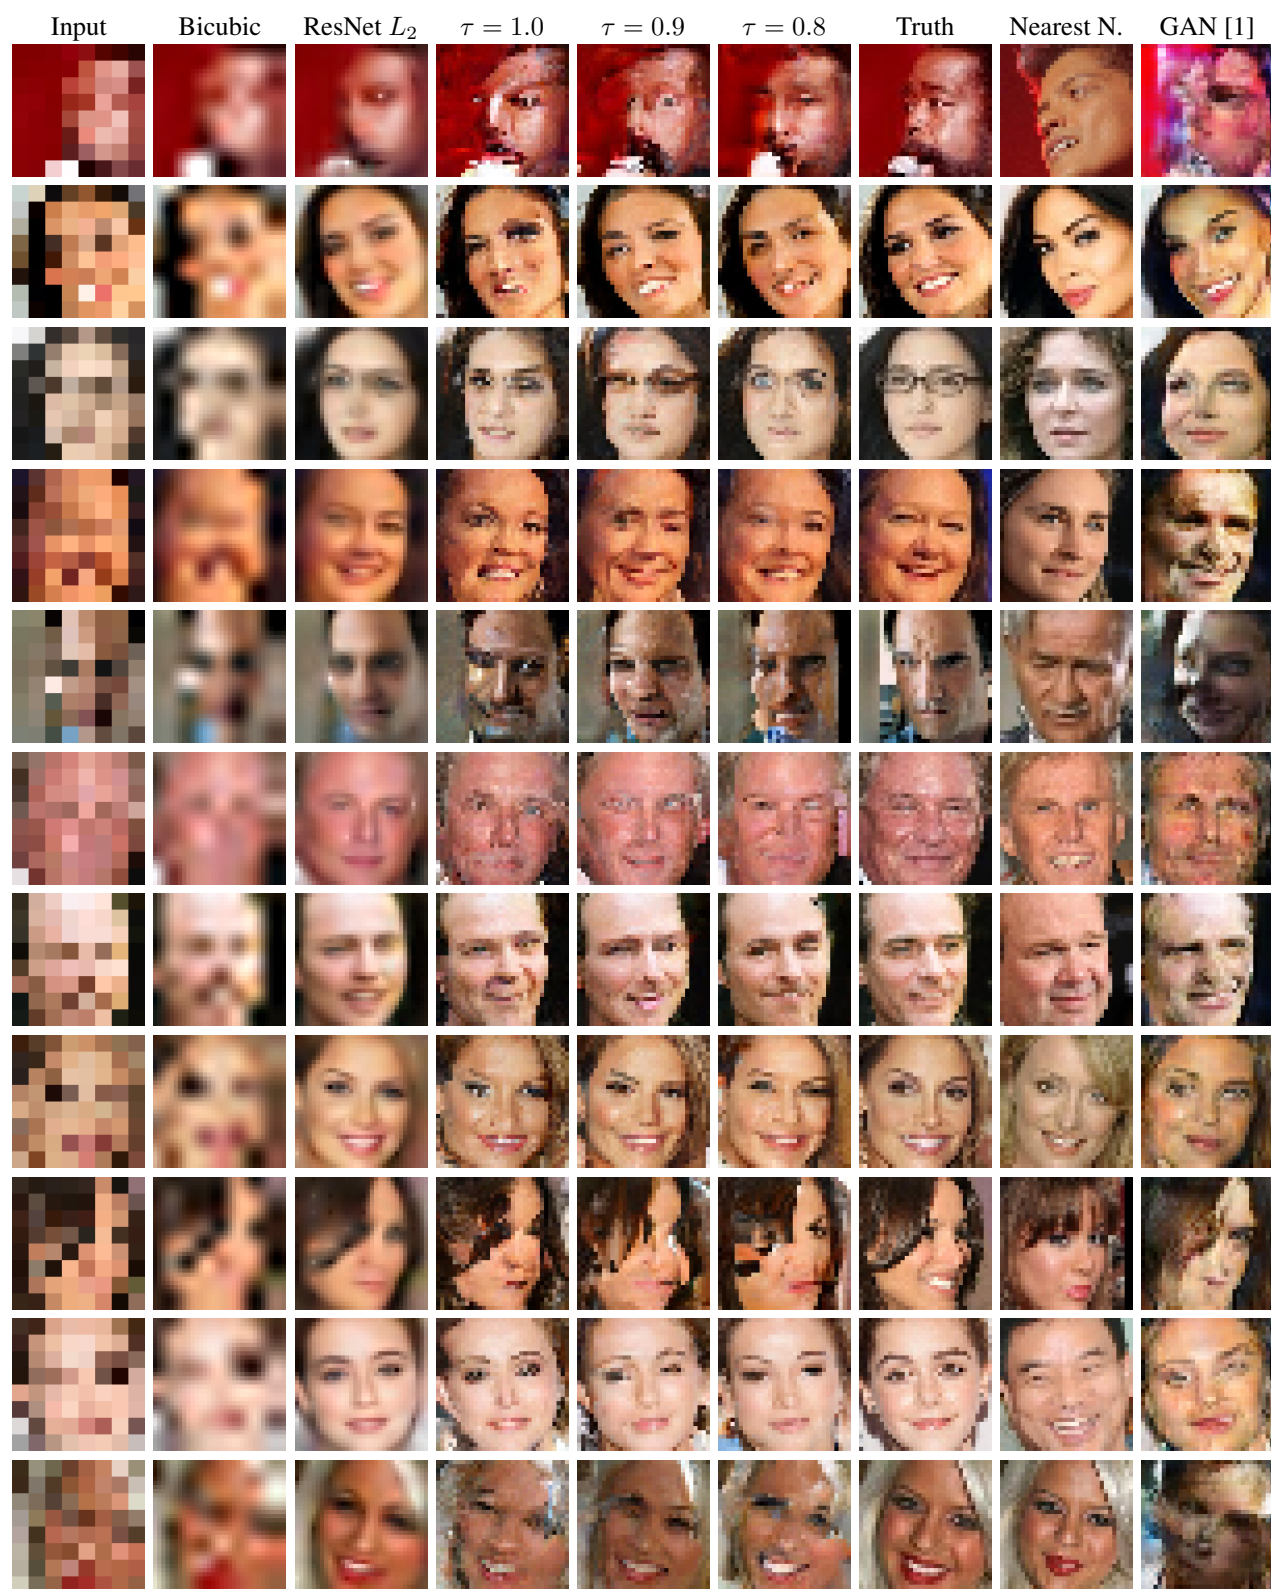

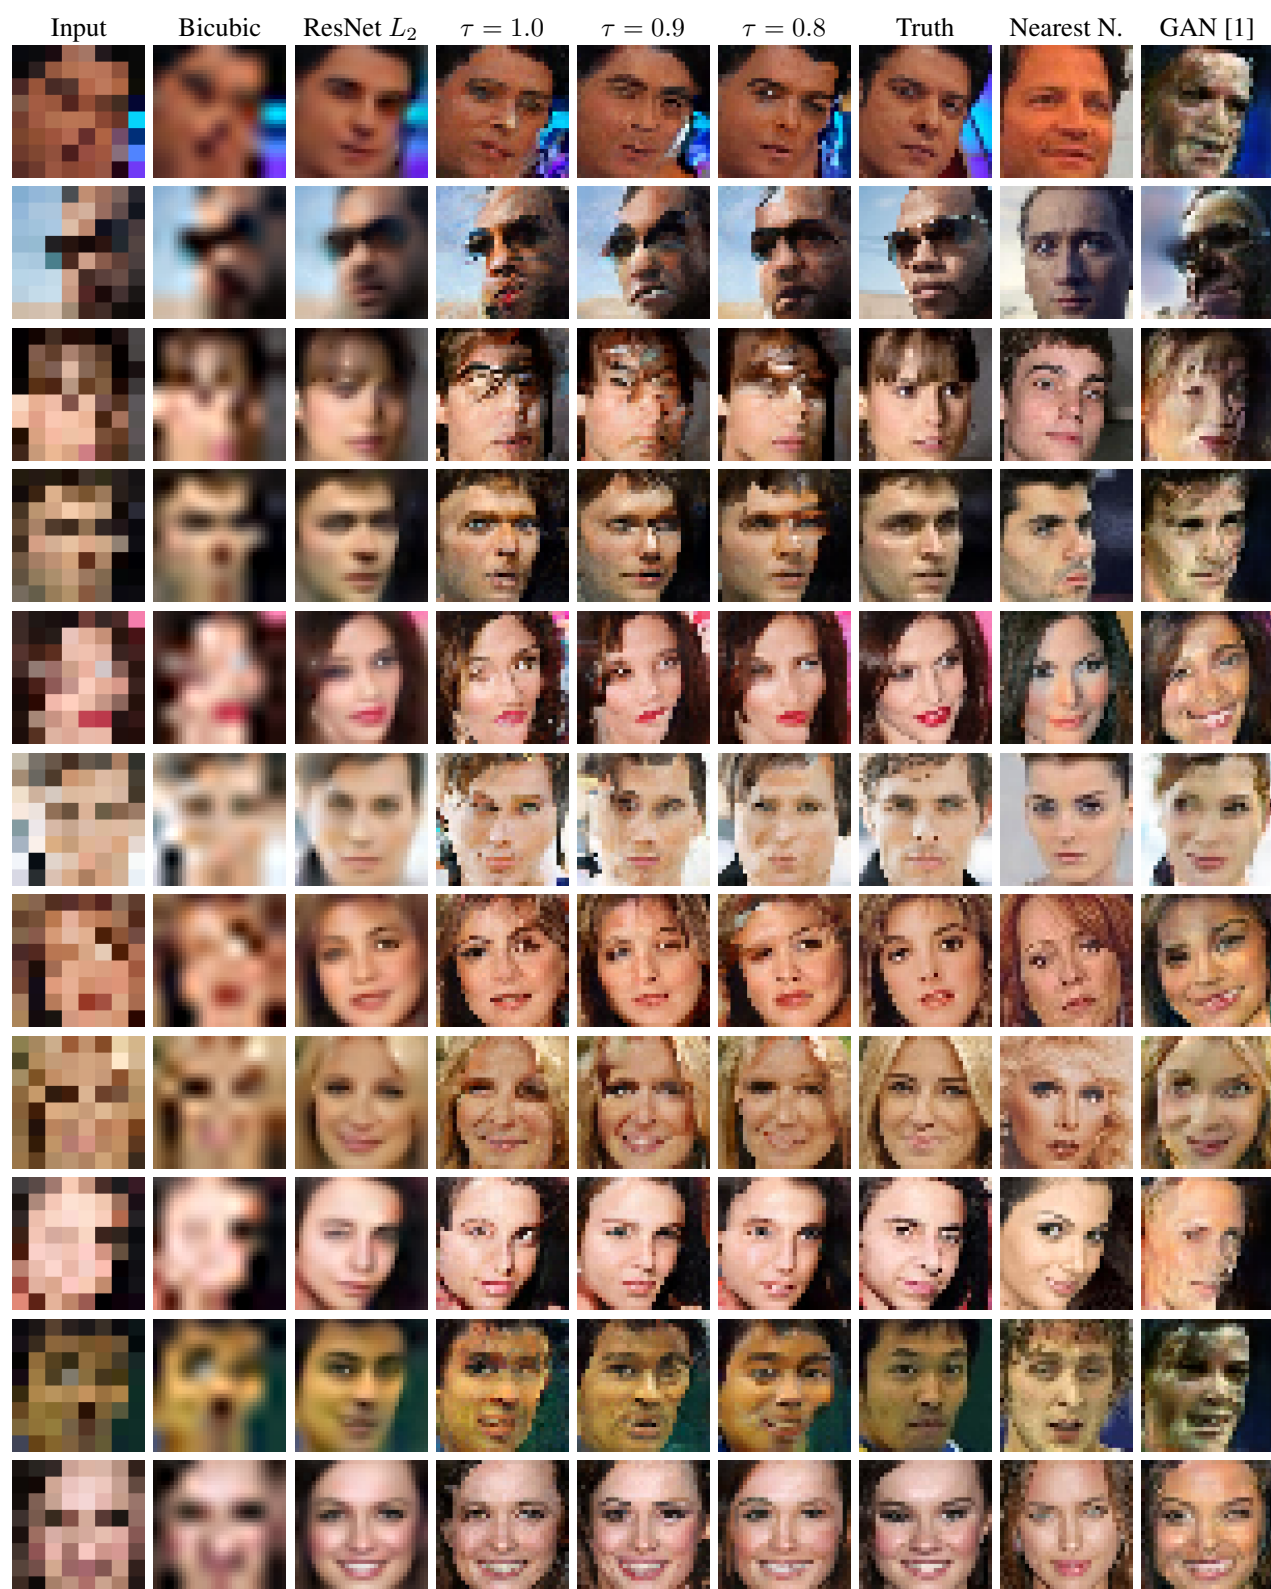



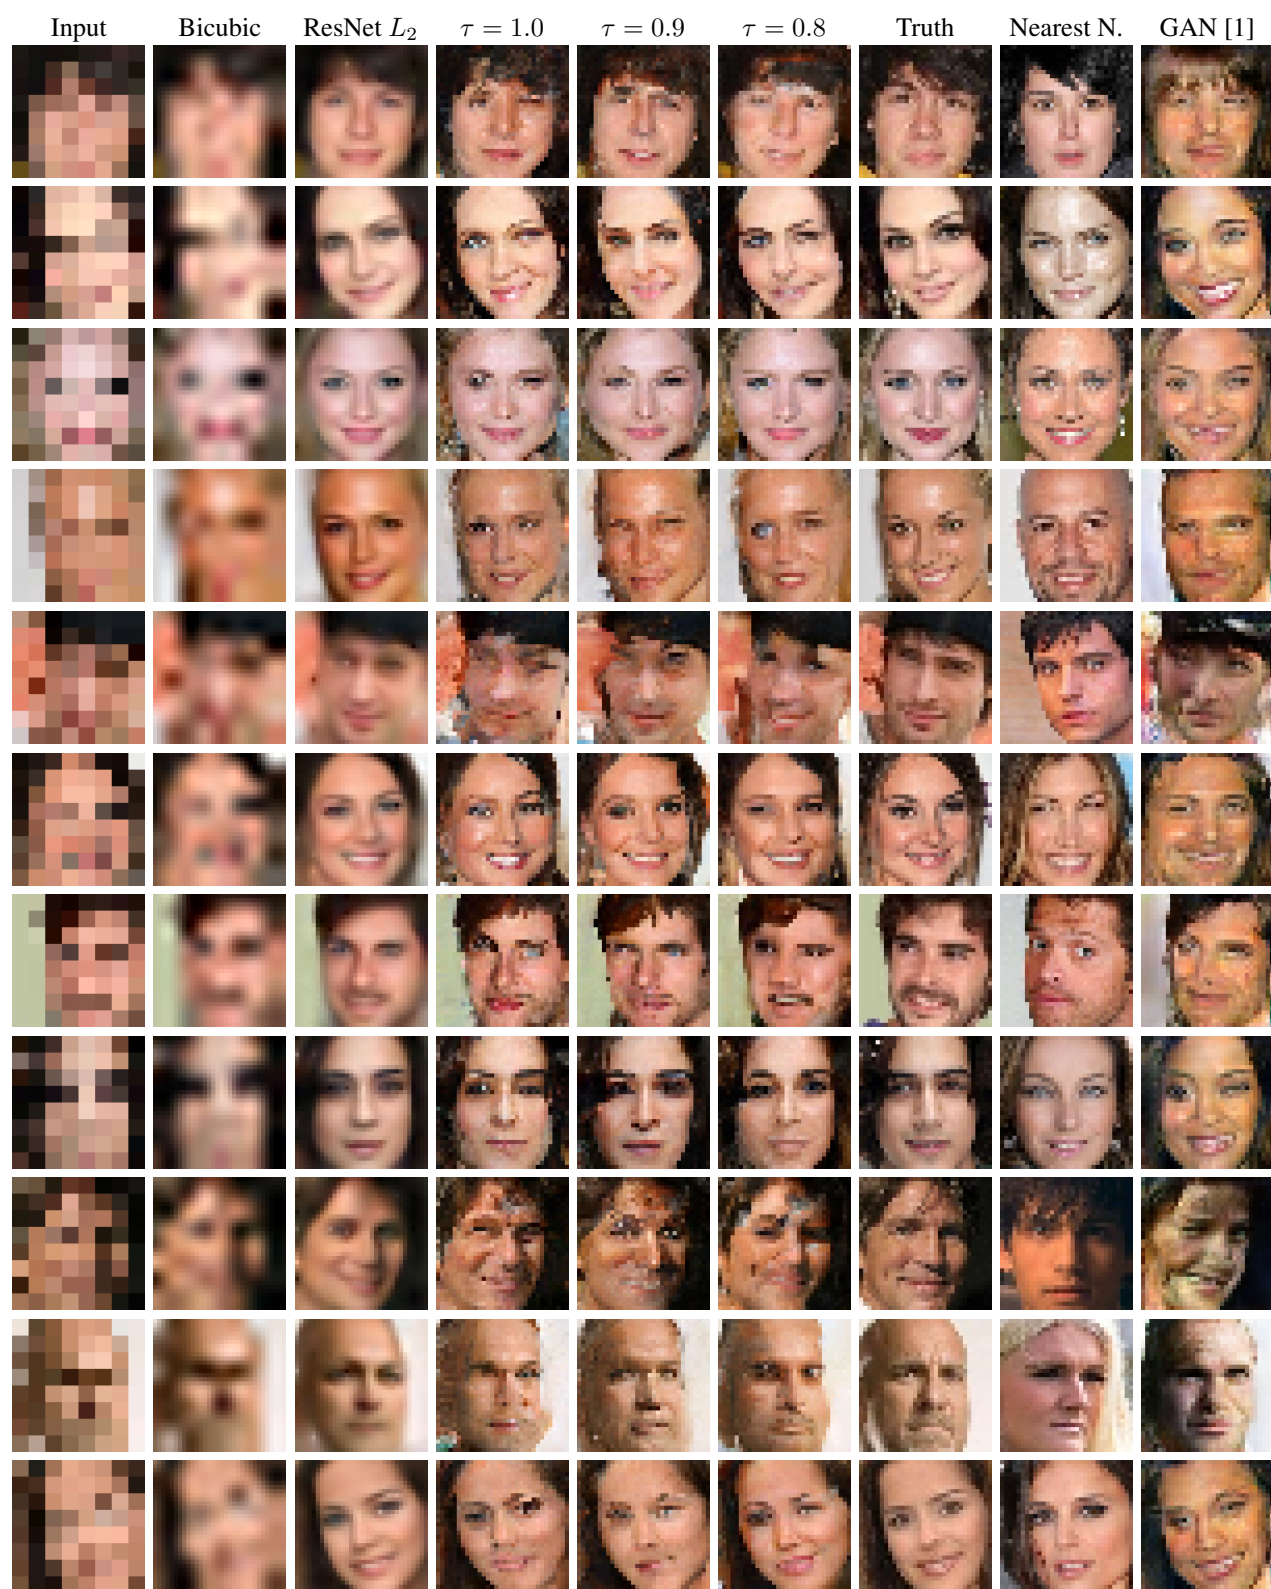

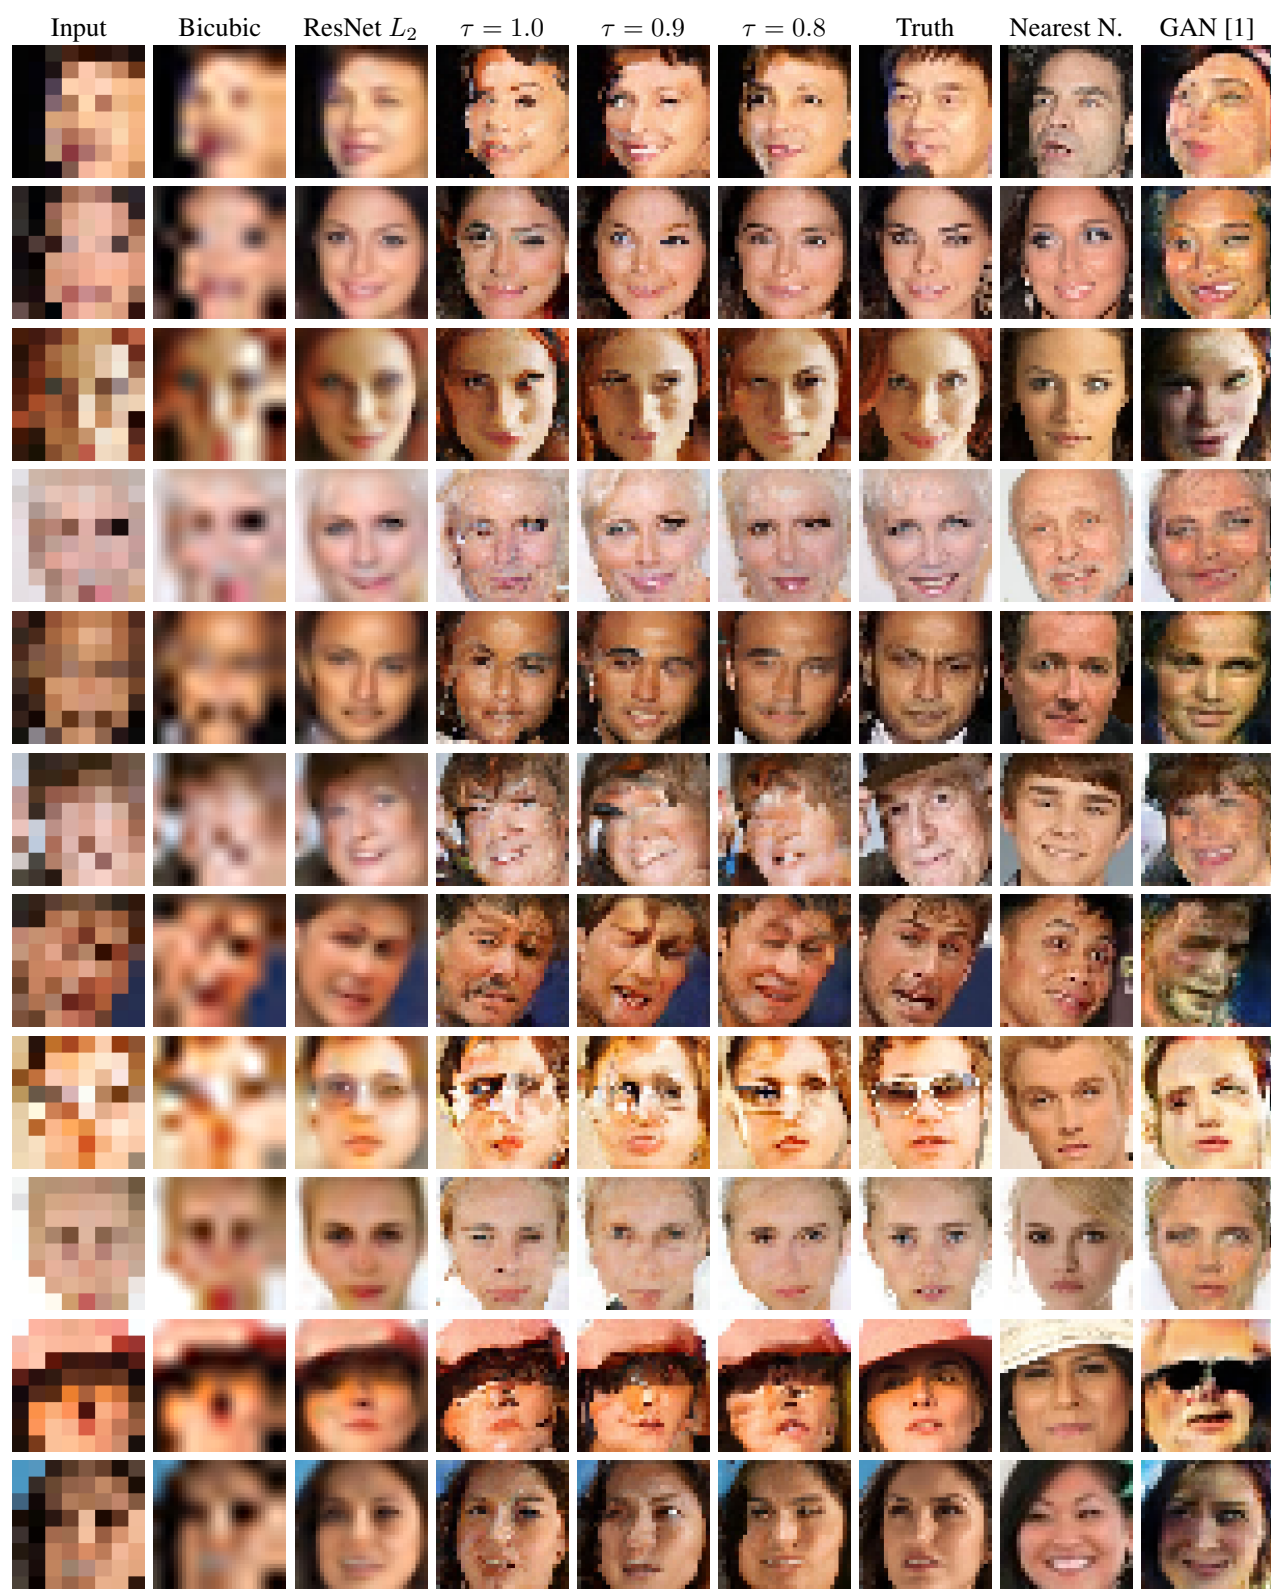

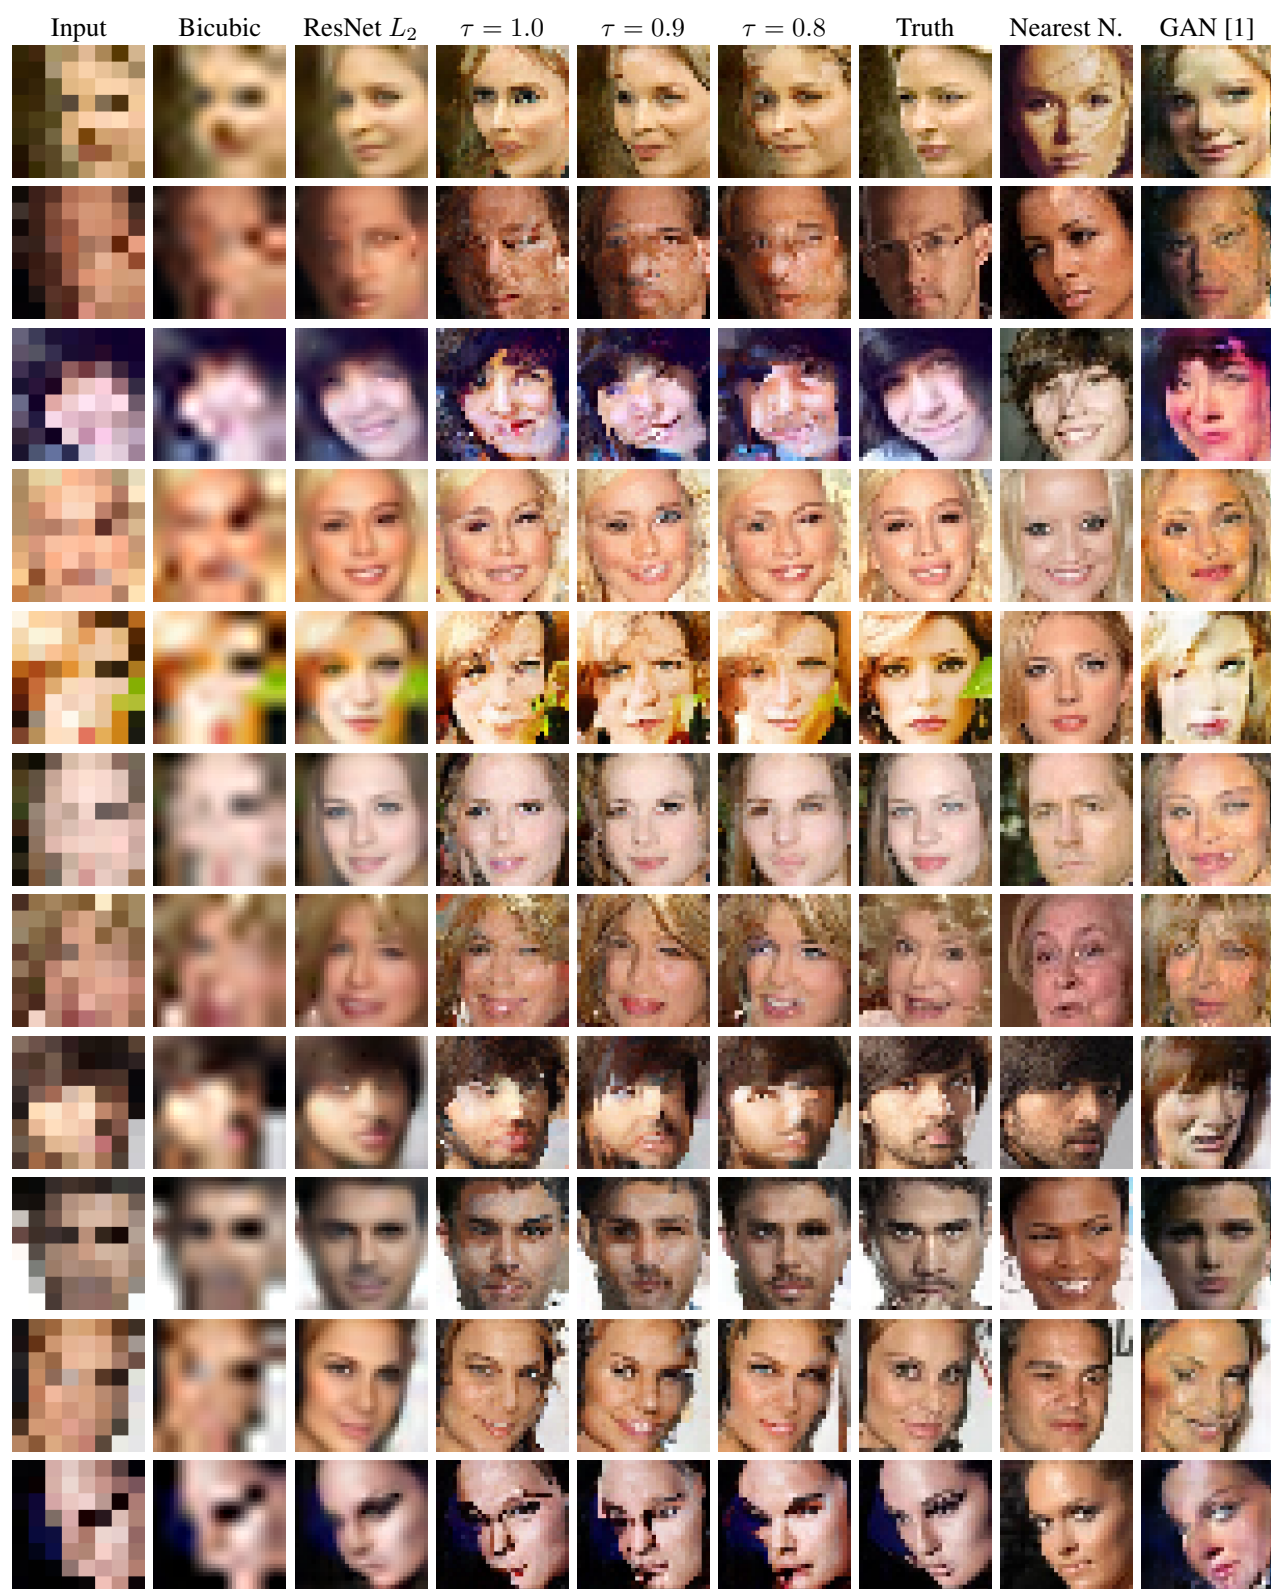

#### 4. Samples images that performed best and worst in human ratings.

The best and worst rated images in the human study. The fractions below the images denote how many times a person choose that image over the ground truth.

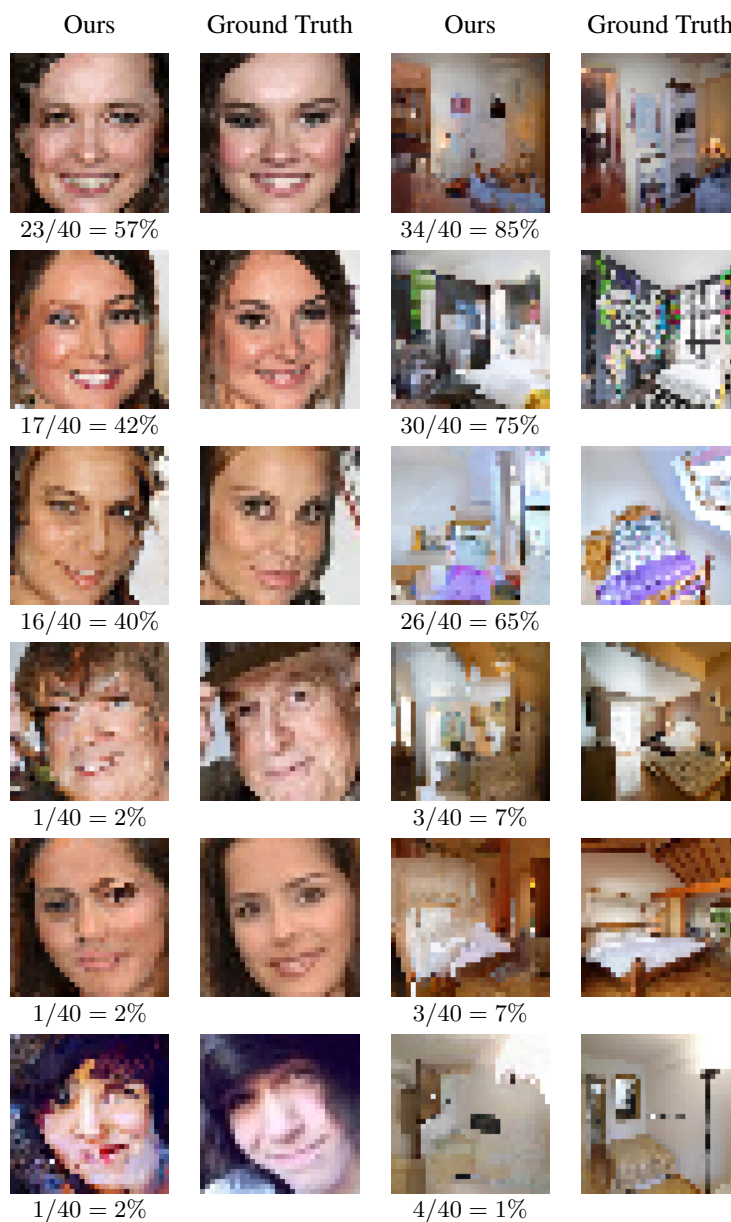

#### References

[1] D. Garcia. srez: Adversarial super resolution. 2016.
